# Supplementary material
Source: MDPI journal article supplement (https://www.mdpi.com/2311-5637/7/3/176)
Supplement: s1 [file s1]

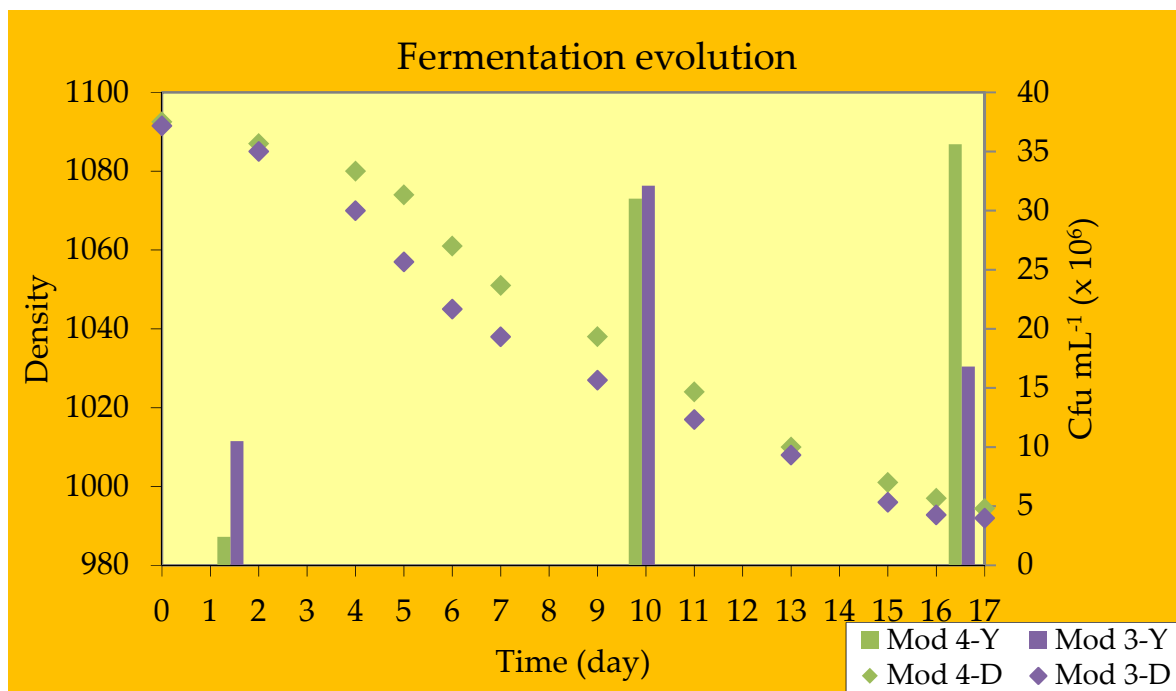

Figure S1. Fermentation evolution evaluated by must density (D) and yeast cell counts (evaluated by culture) (Y) for modalities 3 and 4 of Experiment 2.

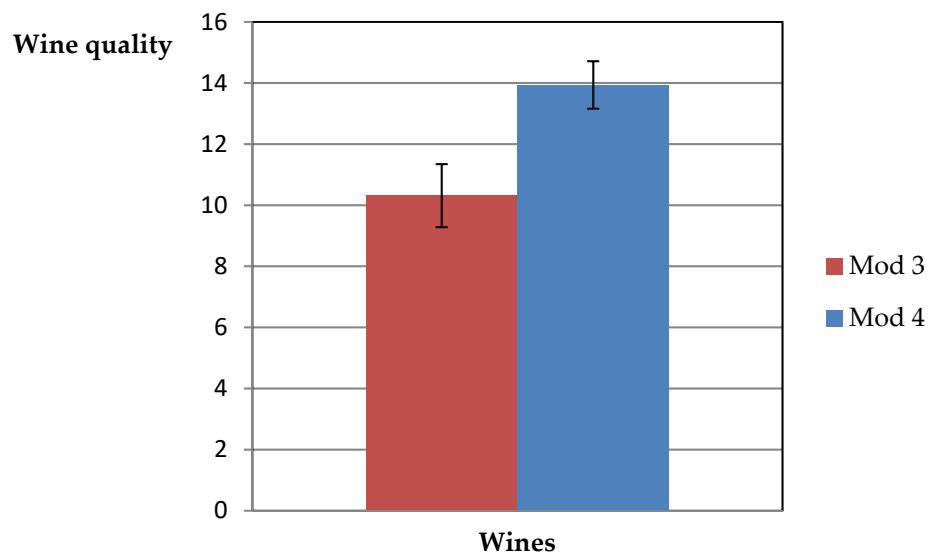

Figure S2. Overall quality of the wines obtained for modalities 3 and 4 of experiment 2. The bars represent the average value obtained with 8 experts from the INIAV Dois Portos tasting panel. The standard deviation is indicated by the error bars at the top.
